# Supplementary material for: Prevalence of internet addiction among college students in the Indian setting: a systematic review and meta-analysis
Source: PubMed Central journal article supplement — Gen Psychiatr. 2021 Aug 20;34(4):e100496. doi: 10.1136/gpsych-2021-100496 (PMC8381302; doi:10.1136/gpsych-2021-100496), 2021-08-20
Supplement: gpsych-2021-100496supp001.pdf [file gpsych-2021-100496supp001.pdf]

## Supplementary Material 1

### Search Strategy using keywords as per databases

**1. PubMed (Search hits-830)** Filters Applied: Journal Articles, Publication date from

2010/01/01 to 2020/12/31

("epidemiology"[MeSH Subheading] OR "epidemiology"[All Fields] OR "prevalence"[All Fields] OR "prevalence"[MeSH Terms] OR "prevalance"[All Fields] OR "prevalences"[All Fields] OR "prevalence s"[All Fields] OR "prevalent"[All Fields] OR "prevalently"[All Fields] OR "prevalents"[All Fields] OR ("internet addiction disorder"[MeSH Terms] OR ("internet"[All Fields] AND "addiction"[All Fields] AND "disorder"[All Fields]) OR "internet addiction disorder"[All Fields] OR ("internet"[All Fields] AND "addiction"[All Fields]) OR "internet addiction"[All Fields])) AND (("college"[All Fields] OR "college s"[All Fields] OR "colleges"[All Fields]) AND ("student s"[All Fields] OR "students"[MeSH Terms] OR "students"[All Fields] OR "student"[All Fields] OR "students s"[All Fields])) AND ("india"[MeSH Terms] OR "india"[All Fields] OR "india s"[All Fields] OR "indias"[All Fields])

**2. Web of Science Core Collection (Search hits-42)** Publication date from 2010/01/01 to 2020/12/31

TOPIC: (internet addiction) OR TOPIC: (excessive internet use) OR TOPIC: (problematic internet use) AND TOPIC: (college students) AND (university students) AND (undergraduates) AND (india)

Refined by: DOCUMENT TYPES: (ARTICLE)

**3. Scopus (Search hits - 19)** Publication date from 2010/01/01 to 2020/12/31

TOPIC: (internet addiction) OR TOPIC: (excessive internet use) OR TOPIC: (problematic internet use) AND TOPIC: (college students) AND (university students) AND (undergraduates) AND (India)

**4. EMBASE (Search Hits- 112)** Publication date from 2010/01/01 to 2020/12/31

TOPIC: (internet addiction) OR TOPIC: (excessive internet use) OR TOPIC: (problematic internet use) AND TOPIC: (college students) AND (university students) AND (undergraduates) AND (India)

**5. PsycInfo ( Search Hits – 29)** Publication date from 2010-01-01 - 2020-12-31

**Topic:-** (internet addiction OR excessive internet use OR problematic internet use)AND (college students OR undergraduates) AND(India)

Duplicates=12

**6. Google Scholar (Search hits- 312)** Publication date from 2010/01/01 to 2020/12/31

Relevant Journals & Search:- Asian Journal of Psychiatry (24), Indian Journal of Psychiatry (68), Indian Journal of Social Psychiatry (21), Indian Journal of Psychological Medicine (27), Journal of Mental Health and Human Behaviour (10), Annals of Indian Psychiatry (9), Eastern Journal of Psychiatry (1), Archives of Mental Health (3), Kerala Journal of Psychiatry (5), Telangana Journal of Psychiatry (3), Indian Journal of Private Psychiatry (6) Indian Journal of Social Work (2), Indian Journal of Psychiatric Nursing (9), Indian Journal of Clinical Psychology (6), Indian Journal of Public Health (53), Indian Journal of Community Medicine (11), Journal of Family Medicine and Primary Care (26), International Journal of Community Medicine and Public Health (28)

**Search terms used:** Internet use, addiction, students, college, India

## Supplementary Material 2

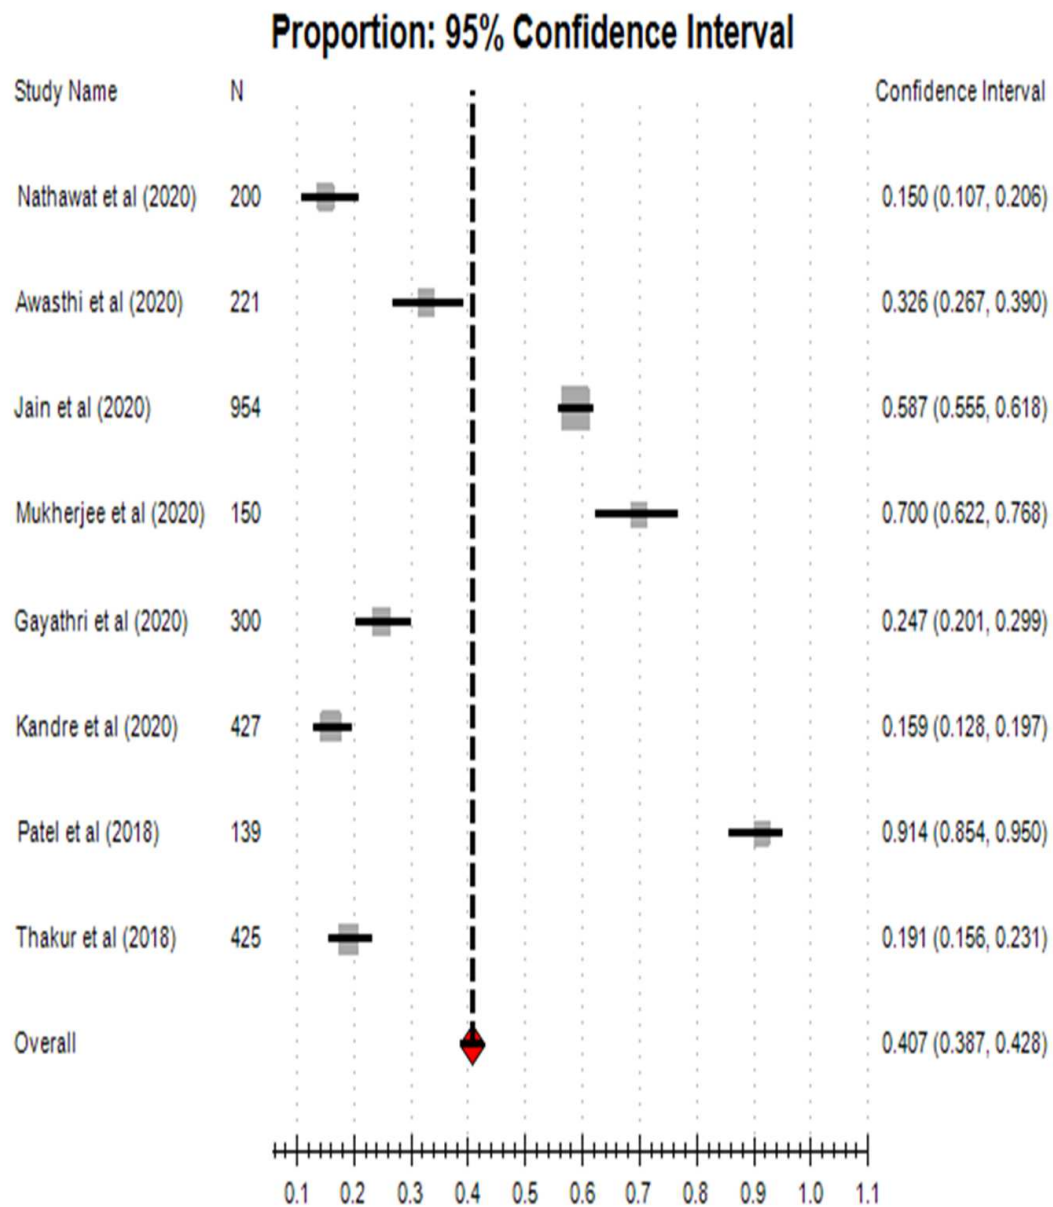

Supplementary Material 2: Pooled prevalence of IA among college students in India(Y-IAT $\geq$ 40), Fixed effect model

**Supplementary Materials 3 Quality Assessment Criteria -Joanna Briggs Institute critical appraisal tool for prevalence studies**

| S No | Author/Year of publication   | Sample frame to address the target population | Sampled in an appropriate way | Sample size adequate | Study subjects and the setting described in detail | Data analysis conducted with sufficient coverage of the identified sample | Valid methods used for the identification of the condition | Was the condition measured in a standard, reliable way for all participants | Appropriate statistical analysis | Was the response rate adequate, and if not, was it managed appropriately? | Score | Remarks       |
|------|------------------------------|-----------------------------------------------|-------------------------------|----------------------|----------------------------------------------------|---------------------------------------------------------------------------|------------------------------------------------------------|-----------------------------------------------------------------------------|----------------------------------|---------------------------------------------------------------------------|-------|---------------|
| 1.   | Parvathy RS et al, 2020      | 1                                             | 0                             | 1                    | 1                                                  | 1                                                                         | 1                                                          | 1                                                                           | 1                                | 1                                                                         | 8     | Low Risk      |
| 2.   | Pathak et al., 2020          | 0                                             | 0                             | 0                    | 0                                                  | 1                                                                         | 1                                                          | 1                                                                           | 1                                | 1                                                                         | 4     | Moderate risk |
| 3.   | Jaiswal et al., 2020         | 1                                             | 1                             | 1                    | 1                                                  | 1                                                                         | 1                                                          | 1                                                                           | 1                                | 1                                                                         | 9     | Low Risk      |
| 4.   | Aqeel KI et al., 2020        | 0                                             | 0                             | 0                    | 0                                                  | 1                                                                         | 1                                                          | 1                                                                           | 1                                | 1                                                                         | 5     | Moderate Risk |
| 5.   | Srivastava M et.al., 2020    | 1                                             | 0                             | 0                    | 1                                                  | 1                                                                         | 1                                                          | 1                                                                           | 1                                | 1                                                                         | 7     | Low Risk      |
| 6.   | Murarkar S K et al., 2020    | 0                                             | 0                             | 0                    | 0                                                  | 1                                                                         | 1                                                          | 1                                                                           | 1                                | 0                                                                         | 4     | High Risk     |
| 7.   | Veena V et al., 2019         | 1                                             | 1                             | 1                    | 1                                                  | 1                                                                         | 1                                                          | 1                                                                           | 1                                | 1                                                                         | 9     | Low Risk      |
| 8.   | Bhatt S et al., 2019         | 0                                             | 0                             | 0                    | 1                                                  | 1                                                                         | 1                                                          | 1                                                                           | 1                                | 1                                                                         | 6     | Moderate Risk |
| 9.   | Athulya G et al., 2019       | 0                                             | 0                             | 0                    | 1                                                  | 1                                                                         | 1                                                          | 1                                                                           | 1                                | 0                                                                         | 5     | Moderate Risk |
| 10.  | Ghanate NA et al., 2019      | 1                                             | 1                             | 0                    | 0                                                  | 1                                                                         | 1                                                          | 1                                                                           | 1                                | 1                                                                         | 7     | Low Risk      |
| 11.  | PadmanabhaI T S et al., 2019 | 0                                             | 0                             | 0                    | 1                                                  | 1                                                                         | 1                                                          | 1                                                                           | 1                                | 1                                                                         | 7     | Low Risk      |
| 12.  | Kishore A et al., 2019       | 0                                             | 0                             | 0                    | 1                                                  | 1                                                                         | 1                                                          | 1                                                                           | 1                                | 1                                                                         | 7     | Low Risk      |
| 13.  | Kannan B et al., 2019        | 1                                             | 1                             | 1                    | 1                                                  | 1                                                                         | 1                                                          | 1                                                                           | 1                                | 0                                                                         | 8     | Low Risk      |
| 14.  | Anand N et al., 2018         | 1                                             | 1                             | 1                    | 1                                                  | 1                                                                         | 1                                                          | 1                                                                           | 1                                | 1                                                                         | 9     | Low Risk      |

|                                 |   |   |   |   |   |   |   |   |   |   |               |
|---------------------------------|---|---|---|---|---|---|---|---|---|---|---------------|
| 15. Anand N et al., 2018        | 1 | 1 | 1 | 1 | 1 | 1 | 1 | 1 | 1 | 9 | Low Risk      |
| 16. Anand N et al., 2018        | 1 | 1 | 1 | 1 | 1 | 1 | 1 | 1 | 1 | 9 | Low Risk      |
| 17. Sharma B et al., 2018       | 1 | 1 | 1 | 1 | 1 | 1 | 1 | 1 | 1 | 9 | Low Risk      |
| 18. Singh G et al., 2018        | 0 | 0 | 0 | 1 | 1 | 1 | 1 | 1 | 0 | 5 | Moderate Risk |
| 19. Gupta et al., 2018          | 1 | 1 | 1 | 1 | 1 | 1 | 1 | 1 | 1 | 9 | Low Risk      |
| 20. Damor R B et al., 2018      | 0 | 0 | 0 | 1 | 1 | 1 | 1 | 0 | 0 | 4 | Moderate Risk |
| 21. Suresh et al., 2018         | 0 | 0 | 0 | 1 | 1 | 1 | 1 | 1 | 1 | 6 | Moderate Risk |
| 22. Kumar et al., 2018          | 0 | 0 | 0 | 1 | 1 | 1 | 1 | 1 | 0 | 6 | Moderate Risk |
| 23. Kumar S et al., 2017        | 1 | 1 | 0 | 1 | 1 | 1 | 0 | 1 | 1 | 7 | Low Risk      |
| 24. Mutalik N R et al., 2017    | 1 | 1 | 1 | 1 | 1 | 1 | 1 | 1 | 1 | 9 | Low Risk      |
| 25. Priya N et al., 2017        | 1 | 0 | 0 | 0 | 1 | 1 | 1 | 1 | 1 | 5 | Moderate Risk |
| 26. Subhaprada C S et al., 2017 | 0 | 0 | 1 | 0 | 1 | 1 | 1 | 1 | 0 | 5 | Moderate Risk |
| 27. Patil SD et al., 2017       | 1 | 1 | 1 | 0 | 0 | 1 | 1 | 1 | 0 | 6 | Moderate Risk |
| 28. Gedam S R et al., 2017      | 1 | 0 | 1 | 1 | 1 | 1 | 1 | 1 | 1 | 8 | Low Risk      |
| 29. Niranjjan R et al., 2017    | 0 | 1 | 0 | 1 | 1 | 1 | 1 | 1 | 0 | 6 | Moderate Risk |
| 30. Nagori N et al., 2016       | 1 | 0 | 0 | 1 | 0 | 1 | 1 | 1 | 0 | 5 | Moderate Risk |
| 31. Bhat A et al., 2016         | 1 | 0 | 0 | 1 | 1 | 1 | 1 | 0 | 0 | 5 | Moderate Risk |
| 32. Gedam et al., 2016          | 1 | 1 | 0 | 1 | 1 | 1 | 1 | 1 | 1 | 8 | Low Risk      |
| 33. Kshatri et al., 2016        | 1 | 0 | 0 | 0 | 1 | 1 | 1 | 1 | 1 | 6 | Moderate Risk |

|     |                              |   |   |   |   |   |   |   |   |   |   |               |
|-----|------------------------------|---|---|---|---|---|---|---|---|---|---|---------------|
| 34. | Nath K et al., 2016          | 0 | 0 | 0 | 1 | 1 | 1 | 1 | 1 | 0 | 5 | Moderate Risk |
| 35. | Chaudhari B et al., 2015     | 1 | 1 | 0 | 1 | 1 | 1 | 1 | 1 | 0 | 7 | Low Risk      |
| 36. | Krishnamurthy S et al., 2015 | 1 | 1 | 1 | 1 | 1 | 1 | 1 | 1 | 1 | 9 | Low Risk      |
| 37. | Bhatt et al., 2015           | 0 | 0 | 0 | 1 | 1 | 1 | 1 | 0 | 0 | 4 | Moderate Risk |
| 38. | Kawa MH et al., 2015         | 0 | 0 | 0 | 1 | 1 | 1 | 1 | 1 | 0 | 5 | Moderate Risk |
| 39. | Sulania, et al., 2015        | 0 | 0 | 0 | 1 | 1 | 1 | 1 | 1 | 1 | 6 | Moderate Risk |
| 40. | Srijampana et al., 2014      | 0 | 1 | 0 | 1 | 1 | 1 | 1 | 0 | 0 | 5 | Moderate Risk |
| 41. | Sharma A et al., 2014        | 1 | 1 | 1 | 1 | 1 | 1 | 1 | 1 | 1 | 9 | Low Risk      |
| 42. | Malviya A et al., 2014       | 1 | 1 | 1 | 1 | 1 | 1 | 1 | 1 | 0 | 8 | Low Risk      |
| 43. | Nathawat et al., 2020        | 1 | 1 | 0 | 1 | 1 | 1 | 1 | 1 | 0 | 7 | Low Risk      |
| 44. | Awasthi et al., 2020         | 1 | 0 | 1 | 1 | 1 | 1 | 1 | 1 | 1 | 8 | Low Risk      |
| 45. | Jain A et.al., 2020          | 1 | 1 | 1 | 1 | 1 | 1 | 1 | 1 | 1 | 9 | Low Risk      |
| 46. | Mukherjee S et.al., 2020     | 0 | 0 | 0 | 1 | 1 | 1 | 1 | 1 | 0 | 5 | Moderate Risk |
| 47. | Gayathri A et.al., 2020      | 1 | 0 | 1 | 0 | 1 | 1 | 1 | 1 | 0 | 6 | Moderate Risk |
| 48. | Kandre et.al., 2020          | 1 | 0 | 0 | 1 | 1 | 1 | 1 | 1 | 1 | 7 | Low Risk      |
| 49. | Patel M V et al., 2018       | 0 | 0 | 0 | 1 | 1 | 1 | 1 | 1 | 0 | 5 | Moderate Risk |
| 50. | Thakur A et al., 2018        | 1 | 1 | 1 | 1 | 1 | 1 | 1 | 1 | 1 | 9 | Low Risk      |

**Supplementary Material 4 Grade Assessment**

| <b>Number of participants (Number of Studies)</b> | <b>Risk of bias</b>      | <b>Inconsistency</b>     | <b>Indirectness</b>      | <b>Imprecision</b>   | <b>Publication bias</b> | <b>Overall quality of evidence</b> |
|---------------------------------------------------|--------------------------|--------------------------|--------------------------|----------------------|-------------------------|------------------------------------|
| 23,717<br>(n=50)                                  | Not serious <sup>1</sup> | Not serious <sup>2</sup> | Not serious <sup>3</sup> | Serious <sup>4</sup> | None <sup>5</sup>       | Moderate<br>⊕⊕⊕                    |

<sup>1</sup>Overall median and mean score of JBI Critical Appraisal Checklist for Studies Reporting Prevalence Data is 7 and 6.72 respectively (Score range 1-9), <sup>2</sup> $I^2$  value is less than 50%, <sup>3</sup>Approximately 60% of the studies were having adequate sample frame to address the target population, <sup>4</sup>There is a wide confidence interval (CI) around the pooled prevalence estimate based on cut off scores. <sup>5</sup>Based on Eggers's test and funnel plot interpretation

**Supplementary Material 5 Funnel plot regarding publication bias**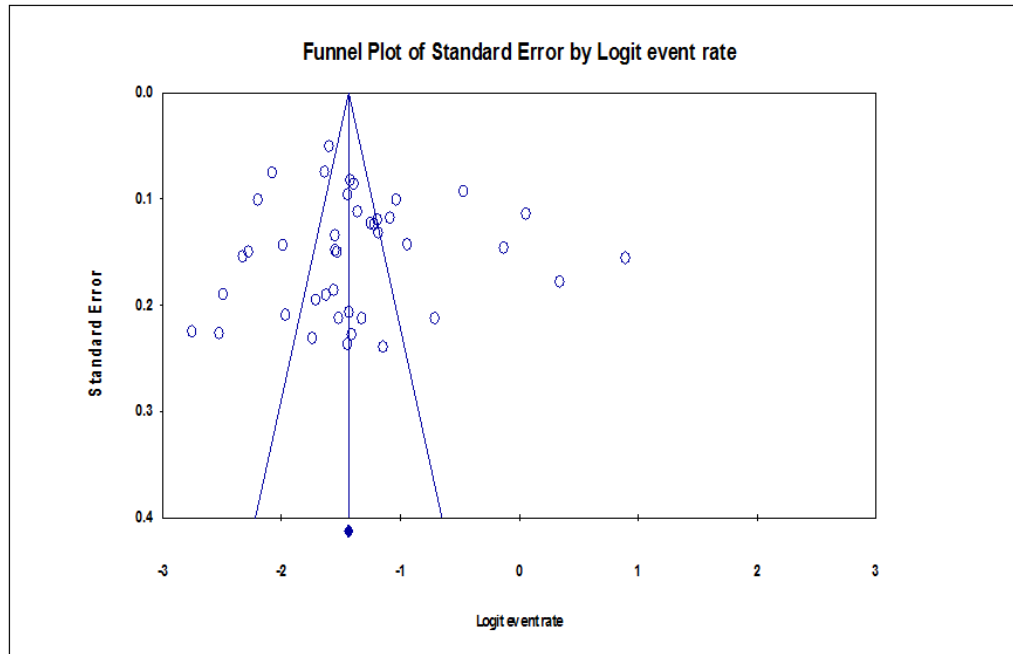

Funnel plot regarding potential publication bias



**Supplementary Material 6 Meta-Regression Analysis**

| <b>Internet<br/>addiction cut<br/>off score</b> | <b>Variable</b>        | <b>Meta-<br/>Regression<br/>coefficient</b> | <b>SE</b> | <b>P</b> | <b>95% CI</b> |
|-------------------------------------------------|------------------------|---------------------------------------------|-----------|----------|---------------|
| Y-IAT>50                                        | Methodological quality | -0.02                                       | 0.011     | 0.118    | -0.04-0.004   |
|                                                 | Publication year       | 0.004                                       | 0.011     | 0.716    | -0.018-0.026  |
| Y-IAT>40                                        | Methodological quality | -0.098                                      | 0.061     | 0.109    | -0.219-0.022  |
|                                                 | Publication year       | -0.095                                      | 0.105     | 0.362    | -0.300-0.110  |
